# Supplementary material
Source: publisher figshare collection journal article supplement (https://acs.figshare.com/ndownloader/files/4202608)
Supplement: Supplementary file 1 [file 4202608]

Fig. S3

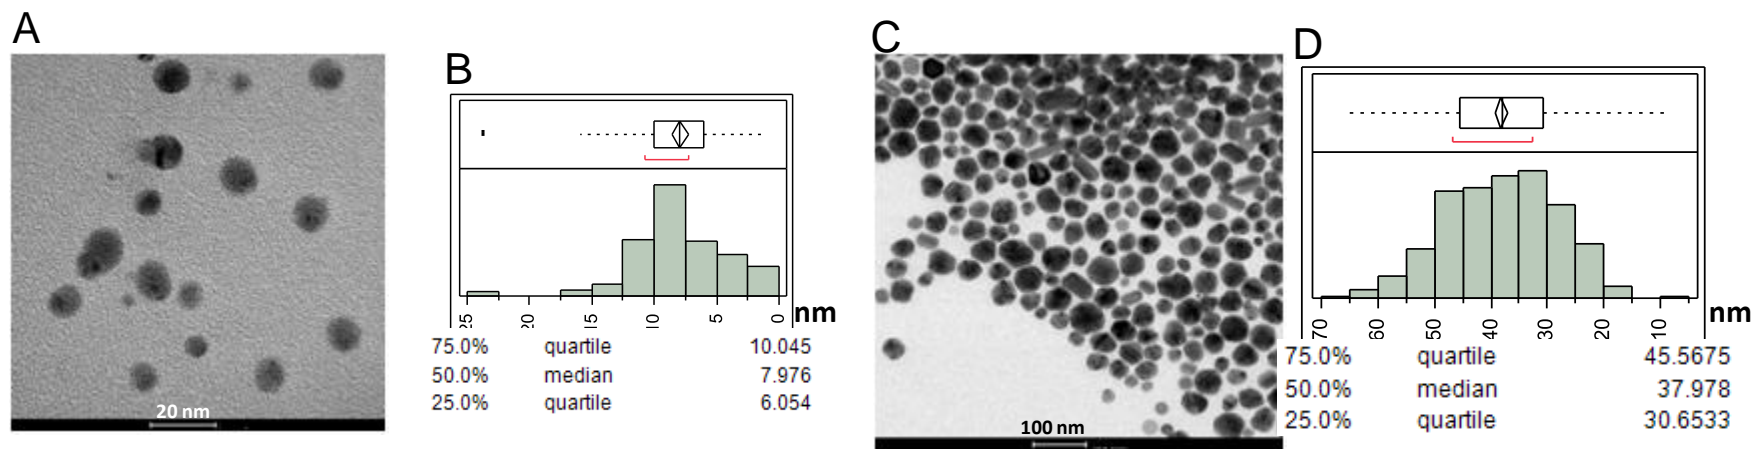

Supporting Information Figure S3: Shape and size distribution of silver nanoparticles: A-B) PVP<sub>8</sub>; C-D) PVP<sub>38</sub>; Sample images were obtained from transmission electron microscopy, and size distributions are based on the TEM pictures.
